# Supplementary material for: Choice of Differentiation Media Significantly Impacts Cell Lineage and Response to CFTR Modulators in Fully Differentiated Primary Cultures of Cystic Fibrosis Human Airway Epithelial Cells
Source: MDPI journal article supplement (doi:10.3390/cells9092137), 2020-09-21
Supplement: s1 [file Table S1_proofs.pdf › Table S1_proofs.pdf]

**Table S1. Chemicals and kits used in this study**

| Chemical                              | Supplier                | Catalog # |
|---------------------------------------|-------------------------|-----------|
| Albumin, Bovine, Fraction V, 98%      | Alfa Aesar              | J64100.22 |
| Alcian Blue solution                  | Sigma-Aldrich           | B8438     |
| Amiloride hydrochloride hydrate       | Sigma-Aldrich           | A7410     |
| BCA protein Assay                     | ThermoFisher Scientific | 10678484  |
| CaCl <sub>2</sub>                     | Sigma-Aldrich           | 21115     |
| CFTR corrector VX-809                 | CFF Therapeutics        |           |
| CFTR potentiator P5                   | CFF Therapeutics        |           |
| CFTR <sub>inh172</sub>                | Tocris Bioscience       | 3430      |
| D-glucose                             | Sigma-Aldrich           | G5767     |
| Dextran-coupled Alexa Fluor 488       | ThermoFisher Scientific | D22910    |
| Dextran-coupled pHrodo Red            | ThermoFisher Scientific | P10361    |
| DMSO                                  | Sigma-Aldrich           | D2438     |
| DPX Mountant for histology            | Sigma-Aldrich           | 6522      |
| Fetal bovine serum                    | Sigma-Aldrich           | F7524     |
| Forskolin                             | Tocris Bioscience       | 1099      |
| Glycine                               | Sigma-Aldrich           | G8898     |
| Ham's F12 medium                      | ThermoFisher Scientific | 11765054  |
| Hematoxylin Solution, Harris Modified | Sigma-Aldrich           | HHS16     |
| Hepes sodium salt                     | Sigma-Aldrich           | H3784     |
| KCl                                   | Sigma-Aldrich           | P9541     |
| MES                                   | Sigma-Aldrich           | M3885     |
| Mitomycin C                           | Sigma-Aldrich           | M4287     |
| MgCl <sub>2</sub>                     | Sigma-Aldrich           | M1028     |
| NaCl                                  | Sigma-Aldrich           | S9888     |
| NaHCO <sub>3</sub>                    | Sigma-Aldrich           | S5761     |
| Nigericin sodium salt                 | Sigma-Aldrich           | N7143     |
| PAS staining kit                      | Sigma-Aldrich           | 1.01646   |
| PBS (phosphate buffer saline)         | ThermoFisher Scientific | 14190250  |
| PFA (paraformaldehyde)                | Sigma-Aldrich           | P6148     |
| pHrodo Red dextran                    | ThermoFisher Scientific | P10361    |
| SDS (Sodium Dodecyl Sulfate)          | Alfa Aesar              | J63394    |
| Sodium Deoxyxolate                    | Sigma-Aldrich           | 30970     |
| Tris Base                             | Sigma-Aldrich           | T1503     |
| Triton X-100                          | Sigma-Aldrich           | T8787     |
| Tween-20                              | Sigma-Aldrich           | P1379     |
| UTP                                   | Sigma-Aldrich           | U6750     |
| Xylene                                | Sigma-Aldrich           | 534056    |
| Y-27632                               | Tocris Bioscience       | 1254      |
