# Supplementary material for: Choice of Differentiation Media Significantly Impacts Cell Lineage and Response to CFTR Modulators in Fully Differentiated Primary Cultures of Cystic Fibrosis Human Airway Epithelial Cells
Source: MDPI journal article supplement (doi:10.3390/cells9092137), 2020-09-21
Supplement: s1 [file Table S2 proofs.pdf › Table S2 proofs.pdf]

**Table S2. Media components**

| Component                                    | Supplier                 | Catalog # | Final concentration                 |
|----------------------------------------------|--------------------------|-----------|-------------------------------------|
| <b>SC medium</b>                             |                          |           |                                     |
| PneumaCult-ALI Basal medium                  | STEMCELL Technologies    | 05002     |                                     |
| PneumaCult-ALI 10x Supplement                | STEMCELL Technologies    | 05003     |                                     |
| Hydrocortisone Stock Solution                | STEMCELL Technologies    | 07925     |                                     |
| PneumaCult-ALI Maintenance Supplement (100x) | STEMCELL Technologies    | 05006     |                                     |
| Heparin Solution                             | STEMCELL Technologies    | 07980     |                                     |
| Penicillin/Streptomycin                      | Thermo Fisher Scientific | 15140-122 | 100 U/mL - 100 µg/mL                |
| <b>BEGM / UNC</b>                            |                          |           |                                     |
| LHC Basal                                    | Thermo Fisher Scientific | 12677019  | 100 % - BEGM                        |
| DMEM high glucose                            | Thermo Fisher Scientific | 11965-092 |                                     |
| LHC Basal : DMEM high glucose                |                          |           | 50:50 - UNC                         |
| Bovine serum albumin                         | Sigma-Aldrich            | A7638     | 0.5 mg/mL                           |
| Insulin                                      | Sigma-Aldrich            | I6634     | $8.7 \times 10^{-7}$ M              |
| Hydrocortisone                               | Sigma-Aldrich            | H0396     | $2.1 \times 10^{-7}$ M              |
| Epidermal growth factor (EGF)                | Thermo Fisher Scientific | PHG0313   | 25 ng/mL - BEGM<br>0.50 ng/mL - UNC |
| Triiodothyronine (T3)                        | Sigma-Aldrich            | T6397     | $1 \times 10^{-8}$ M                |
| Transferrin                                  | Sigma-Aldrich            | T0665     | $1.25 \times 10^{-7}$ M             |
| Epinephrine                                  | Sigma-Aldrich            | E4250     | $2.7 \times 10^{-6}$ M              |
| Phosphoryl ethanolamine (PEA)                | Sigma-Aldrich            | P0503     | $5 \times 10^{-7}$ M                |
| Ethanolamine                                 | Sigma-Aldrich            | E0135     | $5 \times 10^{-7}$ M                |
| Bovine pituitary extract (BPE)               | Sigma-Aldrich            | P1476     | 10 µg/mL                            |
| Selenium                                     | Sigma-Aldrich            | S5261     | $3 \times 10^{-8}$ M                |
| Manganese                                    | Sigma-Aldrich            | M5005     | $10^{-9}$ M                         |
| Silicone                                     | Sigma-Aldrich            | S5904     | $5 \times 10^{-7}$ M                |
| Molybdenum                                   | Sigma-Aldrich            | M1019     | $10^{-9}$ M                         |
| Vanadium                                     | Sigma-Aldrich            | 398128    | $5 \times 10^{-9}$ M                |
| Nickel sulphate                              | Sigma-Aldrich            | N4882     | $10^{-9}$ M                         |
| Tin                                          | Sigma-Aldrich            | 31669     | $5 \times 10^{-10}$ M               |
| Retinoic acid                                | Sigma-Aldrich            | R2625     | $5 \times 10^{-8}$ M                |
| Zinc sulphate                                | Sigma-Aldrich            | Z0251     | $3 \times 10^{-6}$ M                |
| Ferrous sulphate                             | Sigma-Aldrich            | 1270355   | $1.5 \times 10^{-6}$ M              |
| Magnesium chloride                           | Sigma-Aldrich            | M2393     | $6 \times 10^{-4}$ M                |
| Calcium chloride                             | Sigma-Aldrich            | C3881     | $1.1 \times 10^{-4}$ M              |
| Penicillin/Streptomycin                      | Thermo Fisher Scientific | 15140-122 | 100 U/mL - 100 µg/mL<br>– UNC only  |
| Gentamicin                                   | Sigma-Aldrich            | G1397     | 50 µg/mL – BEGM<br>only             |
| Amphotericin B                               | Sigma-Aldrich            | A2942     | 0.25 µg/mL – BEGM<br>only           |
