# Supplementary material for: Choice of Differentiation Media Significantly Impacts Cell Lineage and Response to CFTR Modulators in Fully Differentiated Primary Cultures of Cystic Fibrosis Human Airway Epithelial Cells
Source: MDPI journal article supplement (doi:10.3390/cells9092137), 2020-09-21
Supplement: s1 [file Table S3.pdf › Table S3.pdf]

**Table S3. Differential expression of genes of the Claudin family.** ns: non significant

| hgnc_symbol | Log <sub>2</sub> FC | p-adj                  | Description                                    | Result      |                  |
|-------------|---------------------|------------------------|------------------------------------------------|-------------|------------------|
| CLDN1       | -0.0741             | 7.56×10 <sup>-01</sup> | claudin 1 [Source:HGNC Symbol;Acc:HGNC:2032]   | ns          |                  |
| CLDN3       | -1.2718             | 3.54×10 <sup>-05</sup> | claudin 3 [Source:HGNC Symbol;Acc:HGNC:2045]   | significant | increased in SC  |
| CLDN4       | -0.0794             | 6.76×10 <sup>-01</sup> | claudin 4 [Source:HGNC Symbol;Acc:HGNC:2046]   | ns          |                  |
| CLDN5       | 3.2850              | 3.48×10 <sup>-02</sup> | claudin 5 [Source:HGNC Symbol;Acc:HGNC:2047]   | significant | increased in UNC |
| CLDN7       | 1.4004              | 3.11×10 <sup>-30</sup> | claudin 7 [Source:HGNC Symbol;Acc:HGNC:2049]   | significant | increased in UNC |
| CLDN8       | 1.1198              | 1.06×10 <sup>-09</sup> | claudin 8 [Source:HGNC Symbol;Acc:HGNC:2050]   | significant | increased in UNC |
| CLDN9       | -0.7062             | 8.82×10 <sup>-02</sup> | claudin 9 [Source:HGNC Symbol;Acc:HGNC:2051]   | ns          |                  |
| CLDN10      | -2.4751             | 1.78×10 <sup>-21</sup> | claudin 10 [Source:HGNC Symbol;Acc:HGNC:2033]  | significant | increased in SC  |
| CLDN11      | 1.5002              | 2.95×10 <sup>-01</sup> | claudin 11 [Source:HGNC Symbol;Acc:HGNC:8514]  | ns          |                  |
| CLDN12      | -0.0842             | 7.21×10 <sup>-01</sup> | claudin 12 [Source:HGNC Symbol;Acc:HGNC:2034]  | ns          |                  |
| CLDN15      | -0.0431             | 9.47×10 <sup>-01</sup> | claudin 15 [Source:HGNC Symbol;Acc:HGNC:2036]  | ns          |                  |
| CLDN16      | -1.1784             | 2.02×10 <sup>-07</sup> | claudin 16 [Source:HGNC Symbol;Acc:HGNC:2037]  | significant | increased in SC  |
| CLDN17      | 3.3118              | 1.30×10 <sup>-01</sup> | claudin 17 [Source:HGNC Symbol;Acc:HGNC:2038]  | ns          |                  |
| CLDN18      | 0.2530              | 8.75×10 <sup>-01</sup> | claudin 18 [Source:HGNC Symbol;Acc:HGNC:2039]  | ns          |                  |
| CLDN19      | -2.4860             | 2.31×10 <sup>-02</sup> | claudin 19 [Source:HGNC Symbol;Acc:HGNC:2040]  | significant | increased in SC  |
| CLDN22      | 0.0271              | 9.62×10 <sup>-01</sup> | claudin 22 [Source:HGNC Symbol;Acc:HGNC:2044]  | ns          |                  |
| CLDN23      | 0.0703              | 8.96×10 <sup>-01</sup> | claudin 23 [Source:HGNC Symbol;Acc:HGNC:17591] | ns          |                  |
| CLDN24      | -2.7158             | 2.00×10 <sup>-01</sup> | claudin 24 [Source:HGNC Symbol;Acc:HGNC:37200] | ns          |                  |
