# Supplementary material for: Choice of Differentiation Media Significantly Impacts Cell Lineage and Response to CFTR Modulators in Fully Differentiated Primary Cultures of Cystic Fibrosis Human Airway Epithelial Cells
Source: MDPI journal article supplement (doi:10.3390/cells9092137), 2020-09-21
Supplement: s1 [file Table S4.pdf › Table S4.pdf]

**Table S4. Differential expression of genes of the Monocarboxylate transporters (MCT) family. ns:**  
non significant

| hgnc_symbol | Synonym | Log <sub>2</sub> FC | p-adj                  | Description                                                               | Result                     |                     |
|-------------|---------|---------------------|------------------------|---------------------------------------------------------------------------|----------------------------|---------------------|
| SLC16A1     | MCT1    | 1.5083              | 2.54×10 <sup>-17</sup> | solute carrier family 16 member 1<br>[Source:HGNC Symbol;Acc:HGNC:10922]  | significant                | increased in<br>UNC |
| SLC16A2     | MCT8    | 1.0206              | 3.25×10 <sup>-06</sup> | solute carrier family 16 member 2<br>[Source:HGNC Symbol;Acc:HGNC:10923]  | significant                | increased in<br>UNC |
| SLC16A3     | MCT4    | 1.0920              | 8.35×10 <sup>-10</sup> | solute carrier family 16 member 3<br>[Source:HGNC Symbol;Acc:HGNC:10924]  | significant                | increased in<br>UNC |
| SLC16A4     | MCT5    | 1.4438              | 3.53×10 <sup>-15</sup> | solute carrier family 16 member 4<br>[Source:HGNC Symbol;Acc:HGNC:10925]  | significant                | increased in<br>UNC |
| SLC16A5     | MCT6    | -1.2266             | 8.09×10 <sup>-15</sup> | solute carrier family 16 member 5<br>[Source:HGNC Symbol;Acc:HGNC:10926]  | significant                | increased in<br>SC  |
| SLC16A6     | MCT7    | 2.4929              | 1.18×10 <sup>-06</sup> | solute carrier family 16 member 6<br>[Source:HGNC Symbol;Acc:HGNC:10927]  | significant                | increased in<br>UNC |
| SLC16A7     | MCT2    | 0.7559              | 1.02×10 <sup>-03</sup> | solute carrier family 16 member 7<br>[Source:HGNC Symbol;Acc:HGNC:10928]  | less than 2 fold<br>change |                     |
| SLC16A9     | MCT9    | 0.6411              | 3.03×10 <sup>-04</sup> | solute carrier family 16 member 9<br>[Source:HGNC Symbol;Acc:HGNC:23520]  | less than 2 fold<br>change |                     |
| SLC16A10    | MCT10   | -0.1009             | 9.54×10 <sup>-01</sup> | solute carrier family 16 member 10<br>[Source:HGNC Symbol;Acc:HGNC:17027] | ns                         |                     |
| SLC16A11    | MCT11   | 1.6354              | 5.88×10 <sup>-04</sup> | solute carrier family 16 member 11<br>[Source:HGNC Symbol;Acc:HGNC:23093] | significant                | increased in<br>UNC |
| SLC16A12    | MCT12   | 1.3885              | 1.93×10 <sup>-01</sup> | solute carrier family 16 member 12<br>[Source:HGNC Symbol;Acc:HGNC:23094] | ns                         |                     |
| SLC16A13    | MCT13   | 0.2453              | 4.16×10 <sup>-01</sup> | solute carrier family 16 member 13<br>[Source:HGNC Symbol;Acc:HGNC:31037] | ns                         |                     |
| SLC16A14    | MCT14   | 1.1117              | 4.89×10 <sup>-06</sup> | solute carrier family 16 member 14<br>[Source:HGNC Symbol;Acc:HGNC:26417] | significant                | increased in<br>UNC |
