# Supplementary material for: Choice of Differentiation Media Significantly Impacts Cell Lineage and Response to CFTR Modulators in Fully Differentiated Primary Cultures of Cystic Fibrosis Human Airway Epithelial Cells
Source: MDPI journal article supplement (doi:10.3390/cells9092137), 2020-09-21
Supplement: s1 [file Table S5.pdf › Table S5.pdf]

**Table S5. Differential expression of genes of the Na<sup>+</sup>/H<sup>+</sup> Exchangers and H<sup>+</sup> channels families. ns:**  
non significant

| hgnc_symbol                                      | Log2FC | p-adj                  | Description                                                                             | Result                  |                  |
|--------------------------------------------------|--------|------------------------|-----------------------------------------------------------------------------------------|-------------------------|------------------|
| <i>Na<sup>+</sup> / H<sup>+</sup> Exchangers</i> |        |                        |                                                                                         |                         |                  |
| SLC9A1                                           | 0.979  | 5.29×10 <sup>-14</sup> | solute carrier family 9 member A1<br>[Source:HGNC Symbol;Acc:HGNC:11071]                | less than 2 fold change |                  |
| SLC9A2                                           | 2.580  | 8.29×10 <sup>-07</sup> | solute carrier family 9 member A2<br>[Source:HGNC Symbol;Acc:HGNC:11072]                | significant             | increased in UNC |
| SLC9A3                                           | -0.554 | 5.88×10 <sup>-02</sup> | solute carrier family 9 member A3<br>[Source:HGNC Symbol;Acc:HGNC:11073]                | ns                      |                  |
| SLC9A4                                           | 2.582  | 4.22×10 <sup>-12</sup> | solute carrier family 9 member A4<br>[Source:HGNC Symbol;Acc:HGNC:11077]                | significant             | increased in UNC |
| SLC9A5                                           | 0.983  | 5.74×10 <sup>-01</sup> | solute carrier family 9 member A5<br>[Source:HGNC Symbol;Acc:HGNC:11078]                | ns                      |                  |
| SLC9A6                                           | 0.590  | 9.71×10 <sup>-02</sup> | solute carrier family 9 member A6<br>[Source:HGNC Symbol;Acc:HGNC:11079]                | ns                      |                  |
| SLC9A7                                           | 0.778  | 1.24×10 <sup>-02</sup> | solute carrier family 9 member A7<br>[Source:HGNC Symbol;Acc:HGNC:17123]                | less than 2 fold change |                  |
| SLC9A8                                           | 0.687  | 3.15×10 <sup>-07</sup> | solute carrier family 9 member A8<br>[Source:HGNC Symbol;Acc:HGNC:20728]                | less than 2 fold change |                  |
| SLC9A9                                           | -1.368 | 3.79×10 <sup>-04</sup> | solute carrier family 9 member A9<br>[Source:HGNC Symbol;Acc:HGNC:20653]                | significant             | increased in SC  |
| <i>H<sup>+</sup> channels</i>                    |        |                        |                                                                                         |                         |                  |
| ATP6V1G3                                         | -2.895 | 7.31×10 <sup>-02</sup> | ATPase H <sup>+</sup> transporting V1 subunit G3<br>[Source:HGNC Symbol;Acc:HGNC:18265] | non significant         |                  |
| ATP6V1B1                                         | 1.592  | 1.06×10 <sup>-04</sup> | ATPase H <sup>+</sup> transporting V1 subunit B1<br>[Source:HGNC Symbol;Acc:HGNC:853]   | significant             | increased in UNC |
| ATP6V0A4                                         | -1.529 | 1.61×10 <sup>-08</sup> | ATPase H <sup>+</sup> transporting V0 subunit a4<br>[Source:HGNC Symbol;Acc:HGNC:866]   | significant             | increased in SC  |
| ATP6V0E2                                         | 0.687  | 4.20×10 <sup>-04</sup> | ATPase H <sup>+</sup> transporting V0 subunit e2<br>[Source:HGNC Symbol;Acc:HGNC:21723] | less than 2 fold change |                  |
| ATP6V0B                                          | 0.681  | 6.01×10 <sup>-08</sup> | ATPase H <sup>+</sup> transporting V0 subunit b<br>[Source:HGNC Symbol;Acc:HGNC:861]    | less than 2 fold change |                  |
| ATP6V0E1                                         | 0.672  | 2.26×10 <sup>-11</sup> | ATPase H <sup>+</sup> transporting V0 subunit e1<br>[Source:HGNC Symbol;Acc:HGNC:863]   | less than 2 fold change |                  |
| ATP6V1E1                                         | 0.572  | 1.24×10 <sup>-08</sup> | ATPase H <sup>+</sup> transporting V1 subunit E1<br>[Source:HGNC Symbol;Acc:HGNC:857]   | less than 2 fold change |                  |
| ATP6V1C2                                         | -0.473 | 9.34×10 <sup>-02</sup> | ATPase H <sup>+</sup> transporting V1 subunit C2<br>[Source:HGNC Symbol;Acc:HGNC:18264] | less than 2 fold change |                  |
| ATP6V1B2                                         | 0.441  | 1.48×10 <sup>-03</sup> | ATPase H <sup>+</sup> transporting V1 subunit B2<br>[Source:HGNC Symbol;Acc:HGNC:854]   | less than 2 fold change |                  |
| ATP6V1C1                                         | 0.391  | 2.95×10 <sup>-02</sup> | ATPase H <sup>+</sup> transporting V1 subunit C1<br>[Source:HGNC Symbol;Acc:HGNC:856]   | less than 2 fold change |                  |
| ATP6V1F                                          | 0.356  | 1.02×10 <sup>-02</sup> | ATPase H <sup>+</sup> transporting V1 subunit F<br>[Source:HGNC Symbol;Acc:HGNC:16832]  | less than 2 fold change |                  |
| ATP6V1H                                          | 0.334  | 1.84×10 <sup>-02</sup> | ATPase H <sup>+</sup> transporting V1 subunit H<br>[Source:HGNC Symbol;Acc:HGNC:18303]  | less than 2 fold change |                  |
| ATP6V1A                                          | 0.295  | 2.48×10 <sup>-02</sup> | ATPase H <sup>+</sup> transporting V1 subunit A<br>[Source:HGNC Symbol;Acc:HGNC:851]    | less than 2 fold change |                  |
| ATP6V1G2                                         | -0.264 | 8.88×10 <sup>-01</sup> | ATPase H <sup>+</sup> transporting V1 subunit G2                                        | less than 2 fold change |                  |

|          |        |                        |                                                                                   |                         |
|----------|--------|------------------------|-----------------------------------------------------------------------------------|-------------------------|
|          |        |                        | [Source:HGNC Symbol;Acc:HGNC:862]                                                 |                         |
| ATP6V0A2 | 0.234  | 2.92×10 <sup>-01</sup> | ATPase H+ transporting V0 subunit a2<br>[Source:HGNC Symbol;Acc:HGNC:18481]       | less than 2 fold change |
| ATP6V0D1 | 0.234  | 1.15×10 <sup>-01</sup> | ATPase H+ transporting V0 subunit d1<br>[Source:HGNC Symbol;Acc:HGNC:13724]       | less than 2 fold change |
| ATP6V0C  | 0.221  | 1.93×10 <sup>-01</sup> | ATPase H+ transporting V0 subunit c<br>[Source:HGNC Symbol;Acc:HGNC:855]          | less than 2 fold change |
| ATP6AP2  | 0.181  | 1.62×10 <sup>-01</sup> | ATPase H+ transporting accessory protein 2<br>[Source:HGNC Symbol;Acc:HGNC:18305] | less than 2 fold change |
| ATP6V0D2 | -0.173 | 9.21×10 <sup>-01</sup> | ATPase H+ transporting V0 subunit d2<br>[Source:HGNC Symbol;Acc:HGNC:18266]       | less than 2 fold change |
| ATP6V1G1 | 0.167  | 2.18×10 <sup>-01</sup> | ATPase H+ transporting V1 subunit G1<br>[Source:HGNC Symbol;Acc:HGNC:864]         | less than 2 fold change |
| ATP6V1D  | -0.165 | 3.34×10 <sup>-01</sup> | ATPase H+ transporting V1 subunit D<br>[Source:HGNC Symbol;Acc:HGNC:13527]        | less than 2 fold change |
| ATP6V0A1 | 0.076  | 8.24×10 <sup>-01</sup> | ATPase H+ transporting V0 subunit a1<br>[Source:HGNC Symbol;Acc:HGNC:865]         | less than 2 fold change |
| ATP6V1E2 | 0.061  | 9.02×10 <sup>-01</sup> | ATPase H+ transporting V1 subunit E2<br>[Source:HGNC Symbol;Acc:HGNC:18125]       | less than 2 fold change |

---
