# Supplementary material for: Choice of Differentiation Media Significantly Impacts Cell Lineage and Response to CFTR Modulators in Fully Differentiated Primary Cultures of Cystic Fibrosis Human Airway Epithelial Cells
Source: MDPI journal article supplement (doi:10.3390/cells9092137), 2020-09-21
Supplement: s1 [file Table S6.pdf › Table S6.pdf]

**Table S6. Differential expression of genes of the chaperones family.** Genes in italics are known to interact with CFTR; ns: non significant.

| hgnc_symbol | Synonym             | Log <sub>2</sub> FC | p-adj                  | Description                                                                            | Result                  |                 |
|-------------|---------------------|---------------------|------------------------|----------------------------------------------------------------------------------------|-------------------------|-----------------|
| HSPA1A      | HSP70 member 1A     | -0.618              | 3.27×10 <sup>-03</sup> | heat shock protein family A (Hsp70) member 1A [Source:HGNC Symbol;Acc:HGNC:5232]       | less than 2 fold change |                 |
| HSPA1B      | HSP70 member 1B     | -0.287              | 1.75×10 <sup>-01</sup> | heat shock protein family A (Hsp70) member 1B [Source:HGNC Symbol;Acc:HGNC:5233]       | ns                      |                 |
| HSPA2       | HSP70 member 2      | -1.182              | 4.06×10 <sup>-04</sup> | heat shock protein family A (Hsp70) member 2 [Source:HGNC Symbol;Acc:HGNC:5235]        | significant             | increased in SC |
| HSPA4       | HSP70 member 4      | 0.202               | 7.67×10 <sup>-02</sup> | heat shock protein family A (Hsp70) member 4 [Source:HGNC Symbol;Acc:HGNC:5237]        | ns                      |                 |
| HSPA5       | HSP70 member 5      | 0.845               | 1.97×10 <sup>-20</sup> | heat shock protein family A (Hsp70) member 5 [Source:HGNC Symbol;Acc:HGNC:5238]        | less than 2 fold change |                 |
| HSPA6       | HSP70-B'            | 1.668               | 6.58×10 <sup>-02</sup> | heat shock protein family A (Hsp70) member 6 [Source:HGNC Symbol;Acc:HGNC:5239]        | ns                      |                 |
| HSPA8       | HSC70               | -0.137              | 3.63×10 <sup>-01</sup> | heat shock protein family A (Hsp70) member 8 [Source:HGNC Symbol;Acc:HGNC:5241]        | ns                      |                 |
| HSPA9       | HSP70 member 9      | 0.058               | 7.53×10 <sup>-01</sup> | heat shock protein family A (Hsp70) member 9 [Source:HGNC Symbol;Acc:HGNC:5244]        | ns                      |                 |
| HSPA12A     | HSP70 member 12A    | -0.726              | 1.38×10 <sup>-02</sup> | heat shock protein family A (Hsp70) member 12A [Source:HGNC Symbol;Acc:HGNC:19022]     | less than 2 fold change |                 |
| HSPA13      | HSP70 member 13     | 0.680               | 1.68×10 <sup>-04</sup> | heat shock protein family A (Hsp70) member 13 [Source:HGNC Symbol;Acc:HGNC:11375]      | less than 2 fold change |                 |
| HSPA14      | HSP70 member 14     | 0.345               | 6.18×10 <sup>-02</sup> | heat shock protein family A (Hsp70) member 14 [Source:HGNC Symbol;Acc:HGNC:29526]      | ns                      |                 |
| HSPB1       | small HSP member 1  | -0.084              | 7.21×10 <sup>-01</sup> | heat shock protein family B (small) member 1 [Source:HGNC Symbol;Acc:HGNC:5246]        | ns                      |                 |
| HSPB8       | small HSP member 8  | 0.473               | 2.50×10 <sup>-01</sup> | heat shock protein family B (small) member 8 [Source:HGNC Symbol;Acc:HGNC:30171]       | ns                      |                 |
| HSPB11      | small HSP member 11 | -0.382              | 5.64×10 <sup>-03</sup> | heat shock protein family B (small) member 11 [Source:HGNC Symbol;Acc:HGNC:25019]      | less than 2 fold change |                 |
| HSPD1       | HSP60 member 1      | -0.330              | 1.69×10 <sup>-02</sup> | heat shock protein family D (Hsp60) member 1 [Source:HGNC Symbol;Acc:HGNC:5261]        | less than 2 fold change |                 |
| HSPE1       | HSP10 member 1      | -0.327              | 1.14×10 <sup>-02</sup> | heat shock protein family E (Hsp10) member 1 [Source:HGNC Symbol;Acc:HGNC:5269]        | less than 2 fold change |                 |
| HSP90AA1    | HSP90AA1            | -0.699              | 6.14×10 <sup>-06</sup> | heat shock protein 90 alpha family class A member 1 [Source:HGNC Symbol;Acc:HGNC:5253] | less than 2 fold change |                 |
| HSP90AB1    | HSP90AB1            | -0.396              | 1.19×10 <sup>-04</sup> | heat shock protein 90 alpha family class B member 1 [Source:HGNC Symbol;Acc:HGNC:5258] | less than 2 fold change |                 |

|                      |                    |        |                        |                                                                                             |                            |                     |
|----------------------|--------------------|--------|------------------------|---------------------------------------------------------------------------------------------|----------------------------|---------------------|
| HSP90B1              | HSP90B1            | 0.383  | 2.65×10 <sup>-03</sup> | heat shock protein 90 beta family member 1<br>[Source:HGNC Symbol;Acc:HGNC:12028]           | less than 2<br>fold change |                     |
| <b>Co-chaperones</b> |                    |        |                        |                                                                                             |                            |                     |
| HSPH1                | HSP110<br>member 1 | -0.915 | 1.69×10 <sup>-11</sup> | heat shock protein family H (Hsp110) member 1<br>[Source:HGNC Symbol;Acc:HGNC:16969]        | less than 2<br>fold change |                     |
| DNAJ co-chaperones   |                    |        |                        |                                                                                             |                            |                     |
| DNAJA1               |                    | -0.192 | 9.06×10 <sup>-02</sup> | DnaJ heat shock protein family (Hsp40) member<br>A1 [Source:HGNC Symbol;Acc:HGNC:5229]      | ns                         |                     |
| DNAJA2               |                    | 0.311  | 3.45×10 <sup>-03</sup> | DnaJ heat shock protein family (Hsp40)<br>member A2 [Source:HGNC<br>Symbol;Acc:HGNC:14884]  | less than 2<br>fold change |                     |
| DNAJA3               |                    | 0.137  | 4.32×10 <sup>-01</sup> | DnaJ heat shock protein family (Hsp40)<br>member A3 [Source:HGNC<br>Symbol;Acc:HGNC:11808]  | ns                         |                     |
| DNAJA4               |                    | -0.817 | 7.16×10 <sup>-04</sup> | DnaJ heat shock protein family (Hsp40)<br>member A4 [Source:HGNC<br>Symbol;Acc:HGNC:14885]  | less than 2<br>fold change |                     |
| DNAJB1               |                    | 0.032  | 8.85×10 <sup>-01</sup> | DnaJ heat shock protein family (Hsp40) member<br>B1 [Source:HGNC Symbol;Acc:HGNC:5270]      | ns                         |                     |
| DNAJB2               |                    | -0.238 | 1.65×10 <sup>-01</sup> | DnaJ heat shock protein family (Hsp40) member<br>B2 [Source:HGNC Symbol;Acc:HGNC:5228]      | ns                         |                     |
| DNAJB4               |                    | -0.053 | 8.30×10 <sup>-01</sup> | DnaJ heat shock protein family (Hsp40)<br>member B4 [Source:HGNC<br>Symbol;Acc:HGNC:14886]  | ns                         |                     |
| DNAJB5               |                    | 1.543  | 1.21×10 <sup>-08</sup> | DnaJ heat shock protein family (Hsp40)<br>member B5 [Source:HGNC<br>Symbol;Acc:HGNC:14887]  | significant                | increased<br>in UNC |
| DNAJB6               |                    | -0.204 | 2.29×10 <sup>-01</sup> | DnaJ heat shock protein family (Hsp40)<br>member B6 [Source:HGNC<br>Symbol;Acc:HGNC:14888]  | ns                         |                     |
| DNAJB9               |                    | 0.745  | 1.28×10 <sup>-03</sup> | DnaJ heat shock protein family (Hsp40)<br>member B9 [Source:HGNC<br>Symbol;Acc:HGNC:6968]   | less than 2<br>fold change |                     |
| DNAJB11              |                    | 0.403  | 4.09×10 <sup>-03</sup> | DnaJ heat shock protein family (Hsp40)<br>member B11 [Source:HGNC<br>Symbol;Acc:HGNC:14889] | less than 2<br>fold change |                     |
| DNAJB12              |                    | 0.177  | 3.31×10 <sup>-01</sup> | DnaJ heat shock protein family (Hsp40) member<br>B12 [Source:HGNC Symbol;Acc:HGNC:14891]    | ns                         |                     |
| DNAJB13              |                    | -0.984 | 1.23×10 <sup>-08</sup> | DnaJ heat shock protein family (Hsp40)<br>member B13 [Source:HGNC<br>Symbol;Acc:HGNC:30718] | less than 2<br>fold change |                     |
| DNAJB14              |                    | 0.197  | 3.76×10 <sup>-01</sup> | DnaJ heat shock protein family (Hsp40)<br>member B14 [Source:HGNC<br>Symbol;Acc:HGNC:25881] | ns                         |                     |
| DNAJC1               |                    | 0.955  | 1.64×10 <sup>-07</sup> | DnaJ heat shock protein family (Hsp40)<br>member C1 [Source:HGNC<br>Symbol;Acc:HGNC:20090]  | less than 2<br>fold change |                     |
| DNAJC2               |                    | -0.091 | 6.44×10 <sup>-01</sup> | DnaJ heat shock protein family (Hsp40)<br>member C2 [Source:HGNC<br>Symbol;Acc:HGNC:13192]  | ns                         |                     |
| DNAJC3               |                    | 0.356  | 4.27×10 <sup>-03</sup> | DnaJ heat shock protein family (Hsp40)<br>member C3 [Source:HGNC<br>Symbol;Acc:HGNC:9439]   | less than 2<br>fold change |                     |

|         |        |                        |                                                                                                 |                            |                     |
|---------|--------|------------------------|-------------------------------------------------------------------------------------------------|----------------------------|---------------------|
| DNAJC4  | 0.067  | 8.33×10 <sup>-01</sup> | DnaJ heat shock protein family (Hsp40)<br>member C4 [Source:HGNC<br>Symbol;Acc:HGNC:5271]       | ns                         |                     |
| DNAJC5  | 0.298  | 5.12×10 <sup>-03</sup> | <i>DnaJ heat shock protein family (Hsp40) member<br/>C5 [Source:HGNC Symbol;Acc:HGNC:16235]</i> | less than 2<br>fold change |                     |
| DNAJC5B | -2.420 | 4.39×10 <sup>-02</sup> | DnaJ heat shock protein family (Hsp40)<br>member C5 beta [Source:HGNC<br>Symbol;Acc:HGNC:24138] | significant                | increased<br>in SC  |
| DNAJC6  | -0.766 | 7.30×10 <sup>-02</sup> | DnaJ heat shock protein family (Hsp40)<br>member C6 [Source:HGNC<br>Symbol;Acc:HGNC:15469]      | ns                         |                     |
| DNAJC7  | 0.171  | 2.04×10 <sup>-01</sup> | <i>DnaJ heat shock protein family (Hsp40) member<br/>C7 [Source:HGNC Symbol;Acc:HGNC:12392]</i> | ns                         |                     |
| DNAJC8  | 0.163  | 4.37×10 <sup>-01</sup> | DnaJ heat shock protein family (Hsp40)<br>member C8 [Source:HGNC<br>Symbol;Acc:HGNC:15470]      | ns                         |                     |
| DNAJC9  | -0.015 | 9.69×10 <sup>-01</sup> | DnaJ heat shock protein family (Hsp40)<br>member C9 [Source:HGNC<br>Symbol;Acc:HGNC:19123]      | ns                         |                     |
| DNAJC10 | -0.165 | 3.62×10 <sup>-01</sup> | DnaJ heat shock protein family (Hsp40)<br>member C10 [Source:HGNC<br>Symbol;Acc:HGNC:24637]     | ns                         |                     |
| DNAJC11 | 0.095  | 6.81×10 <sup>-01</sup> | DnaJ heat shock protein family (Hsp40)<br>member C11 [Source:HGNC<br>Symbol;Acc:HGNC:25570]     | ns                         |                     |
| DNAJC12 | 2.043  | 9.30×10 <sup>-05</sup> | DnaJ heat shock protein family (Hsp40)<br>member C12 [Source:HGNC<br>Symbol;Acc:HGNC:28908]     | significant                | increased<br>in UNC |
| DNAJC13 | 0.399  | 3.96×10 <sup>-02</sup> | DnaJ heat shock protein family (Hsp40)<br>member C13 [Source:HGNC<br>Symbol;Acc:HGNC:30343]     | less than 2<br>fold change |                     |
| DNAJC14 | 0.017  | 9.41×10 <sup>-01</sup> | DnaJ heat shock protein family (Hsp40)<br>member C14 [Source:HGNC<br>Symbol;Acc:HGNC:24581]     | ns                         |                     |
| DNAJC15 | 0.476  | 1.74×10 <sup>-03</sup> | DnaJ heat shock protein family (Hsp40)<br>member C15 [Source:HGNC<br>Symbol;Acc:HGNC:20325]     | less than 2<br>fold change |                     |
| DNAJC16 | 0.159  | 5.46×10 <sup>-01</sup> | DnaJ heat shock protein family (Hsp40)<br>member C16 [Source:HGNC<br>Symbol;Acc:HGNC:29157]     | ns                         |                     |
| DNAJC17 | 0.015  | 9.68×10 <sup>-01</sup> | DnaJ heat shock protein family (Hsp40)<br>member C17 [Source:HGNC<br>Symbol;Acc:HGNC:25556]     | ns                         |                     |
| DNAJC18 | 0.022  | 9.66×10 <sup>-01</sup> | DnaJ heat shock protein family (Hsp40)<br>member C18 [Source:HGNC<br>Symbol;Acc:HGNC:28429]     | ns                         |                     |
| DNAJC19 | 0.021  | 9.41×10 <sup>-01</sup> | DnaJ heat shock protein family (Hsp40)<br>member C19 [Source:HGNC<br>Symbol;Acc:HGNC:30528]     | ns                         |                     |
| DNAJC21 | 0.252  | 1.65×10 <sup>-01</sup> | DnaJ heat shock protein family (Hsp40)<br>member C21 [Source:HGNC<br>Symbol;Acc:HGNC:27030]     | ns                         |                     |
| DNAJC22 | -1.714 | 4.29×10 <sup>-07</sup> | DnaJ heat shock protein family (Hsp40)                                                          | significant                | increased           |

|                   |        |                        |                                                                                             |                            |                    |
|-------------------|--------|------------------------|---------------------------------------------------------------------------------------------|----------------------------|--------------------|
|                   |        |                        | member C22 [Source:HGNC<br>Symbol;Acc:HGNC:25802]                                           |                            | in SC              |
| DNAJC24           | 0.254  | 6.22×10 <sup>-01</sup> | DnaJ heat shock protein family (Hsp40)<br>member C24 [Source:HGNC<br>Symbol;Acc:HGNC:26979] | ns                         |                    |
| DNAJC25           | 0.371  | 1.45×10 <sup>-01</sup> | DnaJ heat shock protein family (Hsp40)<br>member C25 [Source:HGNC<br>Symbol;Acc:HGNC:34187] | ns                         |                    |
| DNAJC27           | -0.632 | 6.11×10 <sup>-02</sup> | DnaJ heat shock protein family (Hsp40)<br>member C27 [Source:HGNC<br>Symbol;Acc:HGNC:30290] | ns                         |                    |
| DNAJC28           | 0.248  | 6.77×10 <sup>-01</sup> | DnaJ heat shock protein family (Hsp40)<br>member C28 [Source:HGNC<br>Symbol;Acc:HGNC:1297]  | ns                         |                    |
| DNAJC30           | 0.076  | 8.19×10 <sup>-01</sup> | DnaJ heat shock protein family (Hsp40)<br>member C30 [Source:HGNC<br>Symbol;Acc:HGNC:16410] | ns                         |                    |
| BAG co-chaperones |        |                        |                                                                                             |                            |                    |
| BAG1              | 0.484  | 9.40×10 <sup>-05</sup> | BCL2 associated athanogene 1 [Source:HGNC<br>Symbol;Acc:HGNC:937]                           | less than 2<br>fold change |                    |
| BAG2              | -1.104 | 1.82×10 <sup>-06</sup> | BCL2 associated athanogene 2 [Source:HGNC<br>Symbol;Acc:HGNC:938]                           | significant                | increased<br>in SC |
| BAG3              | 0.124  | 3.63×10 <sup>-01</sup> | BCL2 associated athanogene 3<br>[Source:HGNC Symbol;Acc:HGNC:939]                           | ns                         |                    |
| BAG4              | 0.408  | 8.06×10 <sup>-02</sup> | BCL2 associated athanogene 4<br>[Source:HGNC Symbol;Acc:HGNC:940]                           | ns                         |                    |
| BAG5              | -0.115 | 4.70×10 <sup>-01</sup> | BCL2 associated athanogene 5<br>[Source:HGNC Symbol;Acc:HGNC:941]                           | ns                         |                    |
| BAG6              | 0.099  | 5.46×10 <sup>-01</sup> | BCL2 associated athanogene 6<br>[Source:HGNC Symbol;Acc:HGNC:13919]                         | ns                         |                    |
| HSPBP1            | -0.810 | 1.44×10 <sup>-09</sup> | HSPA (Hsp70) binding protein 1<br>[Source:HGNC Symbol;Acc:HGNC:24989]                       | less than 2<br>fold change |                    |
| STUB1             | -0.212 | 2.14×10 <sup>-01</sup> | STIP1 homology and U-box containing protein<br>1 [Source:HGNC Symbol;Acc:HGNC:11427]        | ns                         |                    |
| STIP1             | -0.117 | 5.35×10 <sup>-01</sup> | stress induced phosphoprotein 1 [Source:HGNC<br>Symbol;Acc:HGNC:11387]                      | ns                         |                    |
